# Supplementary material for: Early perturbation of Wnt signaling reveals patterning and invagination-evagination control points in molar tooth development
Source: Oxford University Press journal article supplement (doi:10.1242/dev.199685), 2021-07-01
Supplement: dev199685supp.pdf [file dev199685supp.pdf]

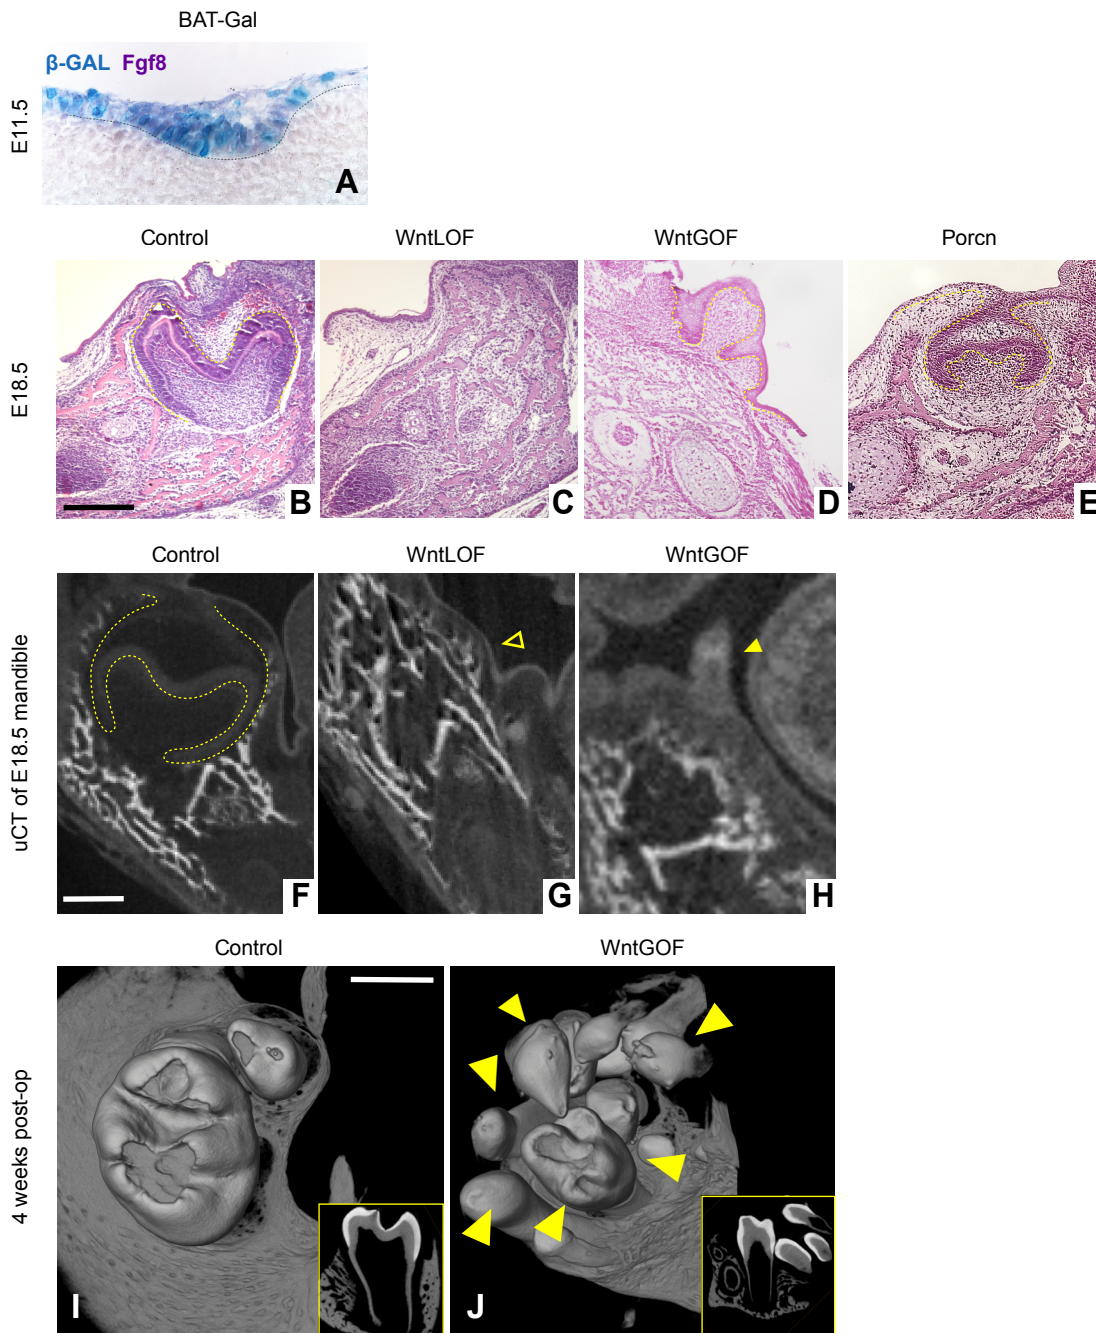

**Fig. S1. WntLOF leads to anodontia and WntGOF induces supernumerary teeth formation.** (A) Co-localization of *BAT-GAL* and *Fgf8* mRNA expression. (B-H) Histological sections (B-E) and  $\mu$ CT (F-H) of presumptive molar field at E18.5. Yellow dotted line: epithelial-mesenchymal border. Open arrowhead, presumptive molar site in WntLOF (G). Filled arrowhead, evaginating structure in WntGOF (H). (I and J)  $\mu$ CT of explants of WntGOF and littermate control 4 weeks post-reneal graft. Scale bar: 100  $\mu$ m for B-H; 500  $\mu$ m for I and J.

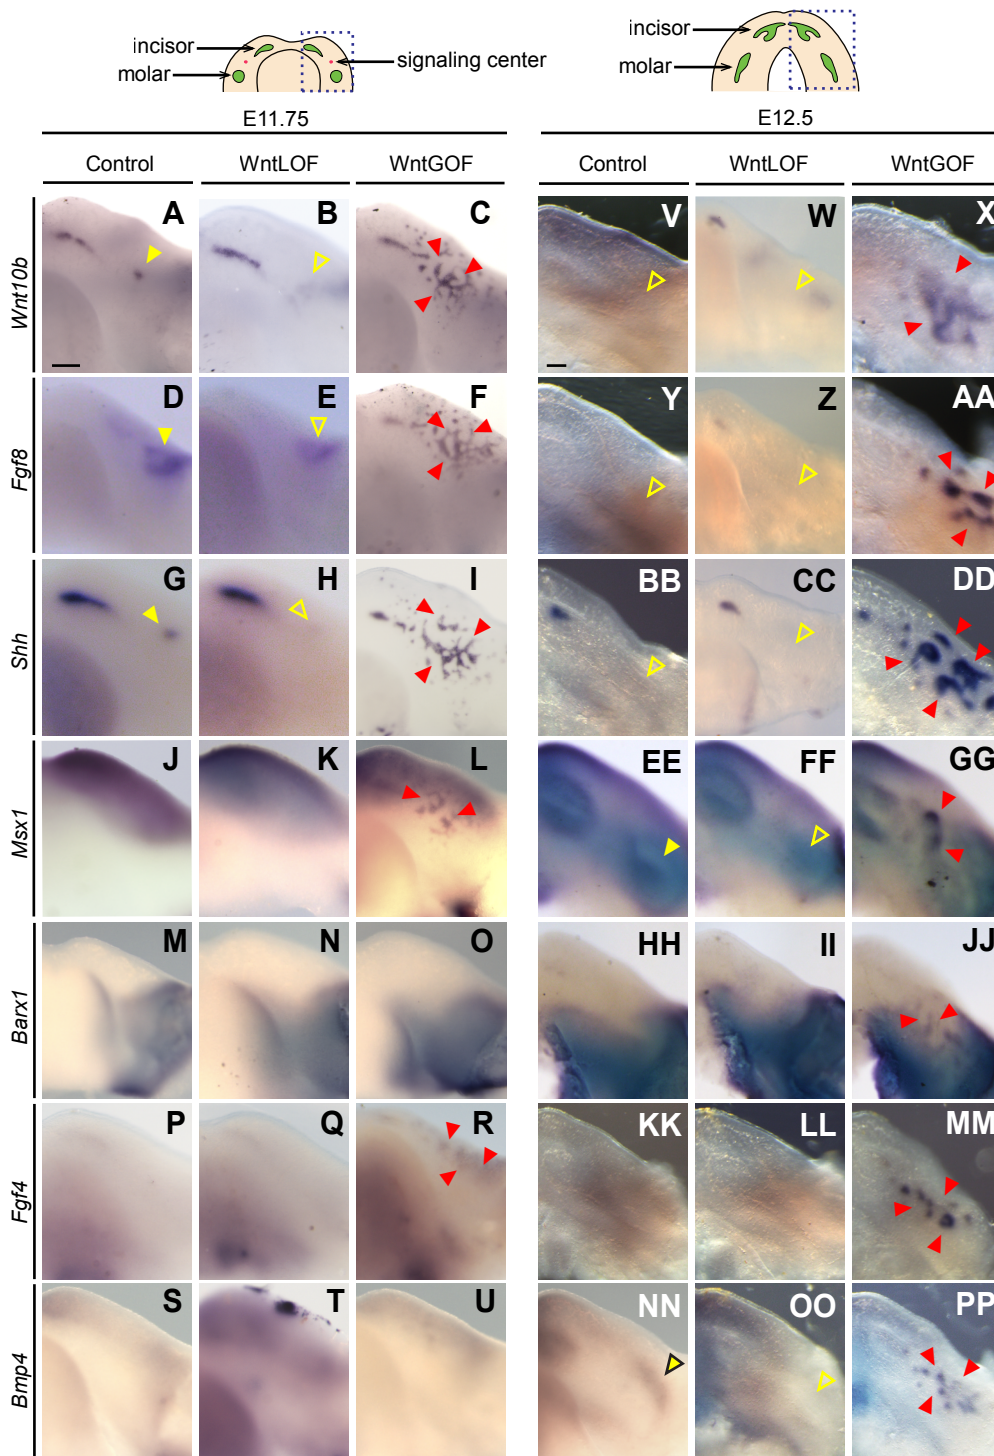

**Fig. S2. Expression of odontogenic genes are perturbed in WntGOF and WntLOF mutants.** (A-PP) Oral surface view of odontogenic gene expressions in control, WntLOF and WntGOF at E11.75 (A-U) and E12.5 (V-PP). Filled yellow arrowheads, expression in molar tooth germ (D and BB) and signaling center (A and G). Red arrowheads, ectopic expression. Open arrowheads, reduced expression. Scale bar 1mm.



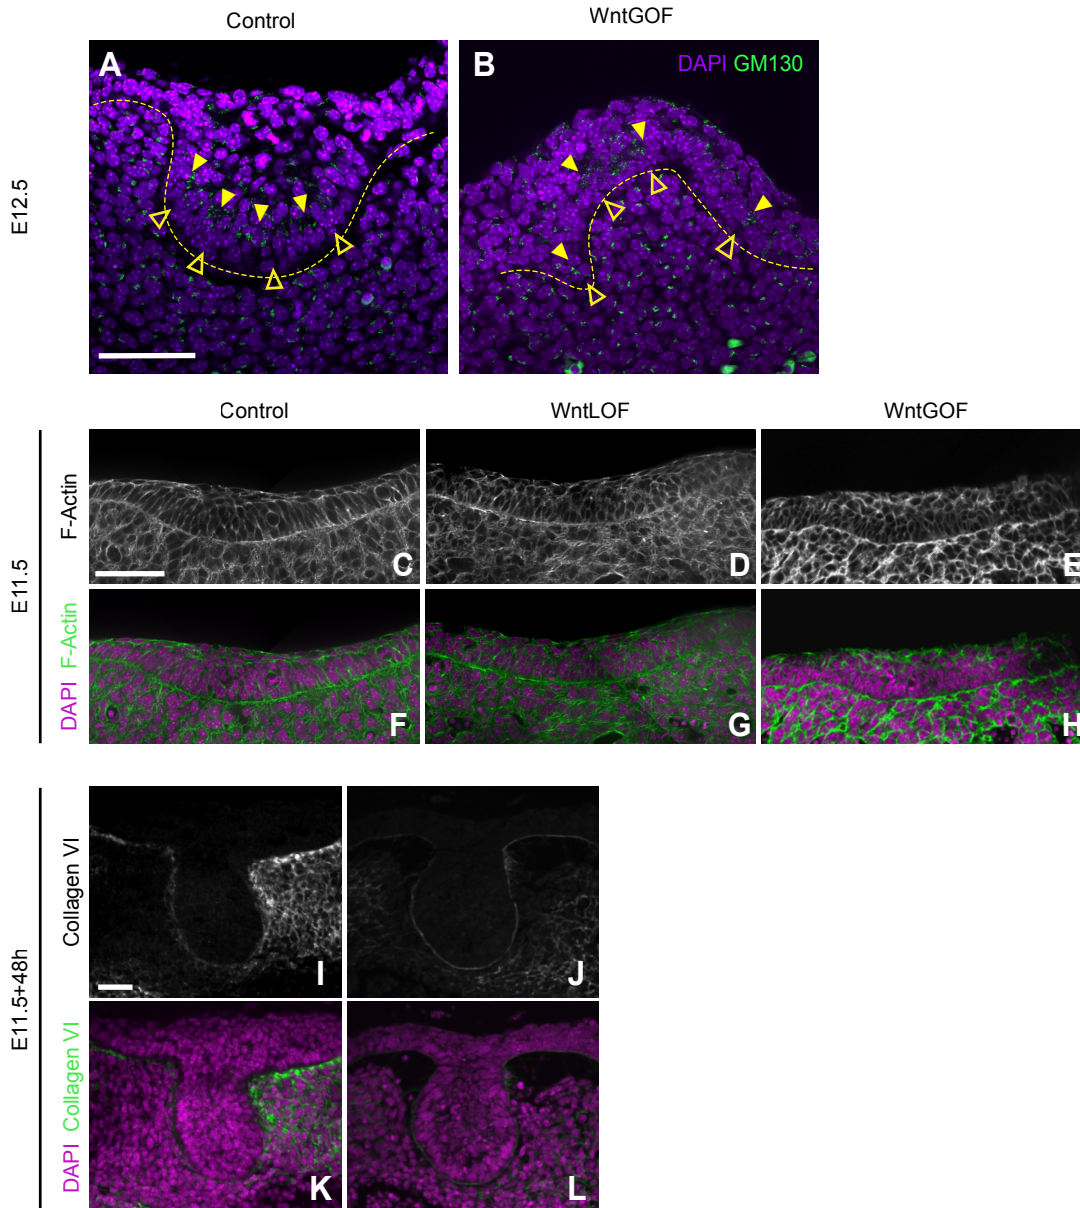

**Fig. S3. The epithelial basoapical polarity is maintained in WntGOF and Mithramycin A inhibits collagen VI expression.** (A-B) GM130 expression in E12.5 tooth germ in control and WntGOF. Closed arrowhead, GM130. Open arrowhead, basal cell nuclei. (C-H) F-actin staining of presumptive tooth germ of control, WntLOF and WntGOF at E11.5. (I-L) Collagen VI expression in Mithramycin A treated control explants at E11.5+48h. Scale bar: 50  $\mu$ m for A-L.

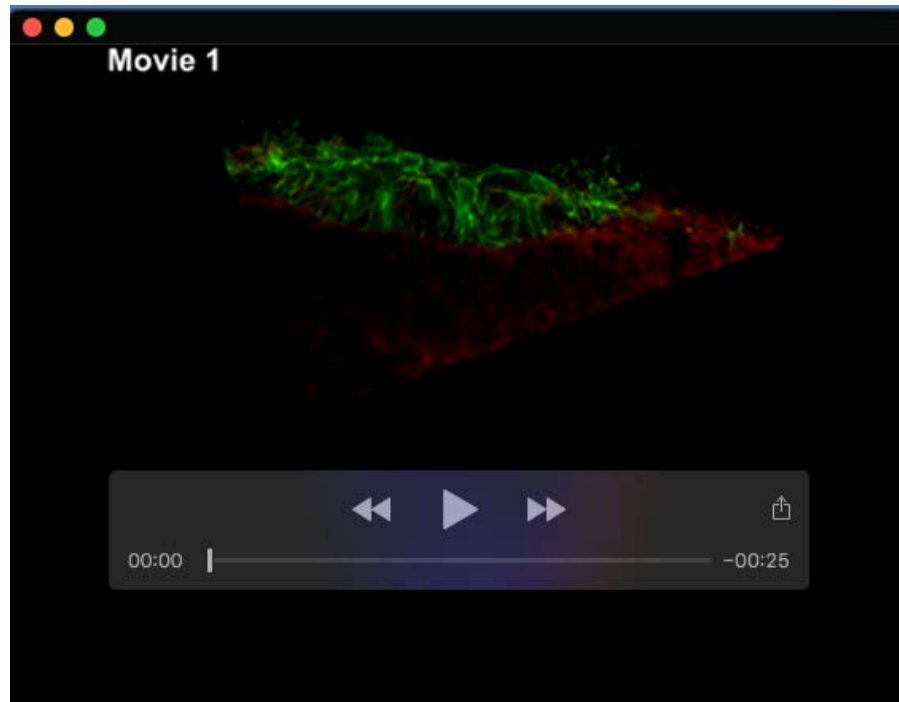

**Movie 1. The control molar epithelium becomes narrower and deeper as it invaginates into underlying mesenchyme.** Time-lapse imaging of frontal tissue section of E11.5 control mandible (*Fgf8<sup>CreER</sup>;R26<sup>mT/mG</sup>*) for 16 hours. Green (mG-positive): dental epithelial cells; red (mT-positive): non-dental epithelial cells.

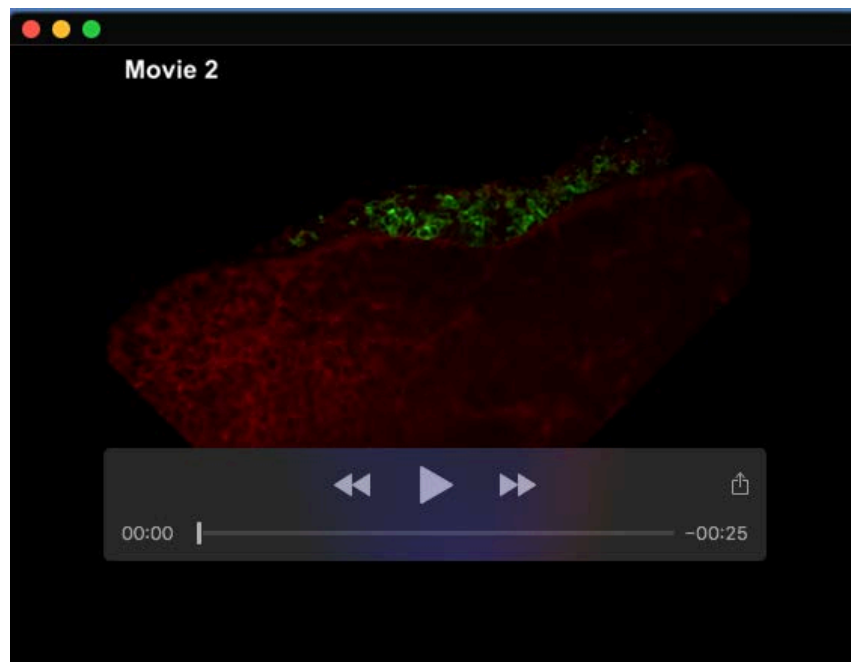

**Movie 2. The WntLOF molar epithelium remains shallow and wide.** Time-lapse imaging of frontal section of E11.5 WntLOF mandible (*Fgf8<sup>CreER</sup>;Ctnnb1<sup>fl/fl</sup>;R26<sup>mT/mG</sup>*) for 16 hours. Green: dental epithelial cells; red: non-dental epithelial cells.
